# Supplementary material for: Scarce resources, public health and professional care: the COVID-19 pandemic exacerbating bioethical conflicts — findings from global qualitative expert interviews
Source: Springer Nature journal article supplement (doi:10.1186/s12889-023-17249-4), 2023-12-13
Supplement: MOESM1 [file 26524320]

## Interview Guideline

### „Medicine and Ethics go viral: The Ethics of Covid-19-health-care A global mapping of bioethical perspectives“

- 1) Please first explain briefly your expertise in bioethics/medical ethics/public health ethics. What is your personal experience and involvement in the debates about Covid-19? Could you please characterize briefly the health care system in your country?
- 2) If you characterized the bioethical debates because of the pandemic in your country, which ones would be the three most important ones you personally see?
- 3) When you consider the situation of clinics and ICU units in your country, how would you describe the main bioethical conflicts there?
- 4) How far are scarcity of allocation and conflicts of treatment priority between COVID-19 and non-Covid patients of concern in your country?
- 5) Considering the situation of long-term-care/elderly-care in your country, do you see any changes due to the pandemic and how would you describe them?
- 6) Thinking of public debates in your country around professional care (nurses and doctors) during the last months, which bioethical conflicts were mainly discussed in public/the media?
- 7) Does there exist any discrepancy between what is publicly discussed and what you and other experts see as the main bioethical problems?
- 8) What role do ethical conflicts between solidarity and individual freedom play in the public discourse in your country and in which concrete debates does this arise?
- 9) What role does the topic of discrimination (age, gender, migration background, disability, ethnic, colour, class, etc.) play in current debates in your country?
- 10) Do you see any conflicts concerning research ethics in your country?
- 11) Could you name concrete examples/situations where ethicists in your country are involved in finding solutions to current challenges?
- 12) What would you expect out of increased international exchange among bioethicists regarding all these challenges? What would be helpful?
- 13) Is there anything we have not discussed yet but should be mentioned in your opinion?
